# Supplementary material
Source: ML conference proceedings conference paper supplement (https://openreview.net/forum?id=v2oGdhbKxi)
Supplement: supplementary_material [file attachment]

# Supplementary Material

**Jinrang Jia\***  
Baidu Inc.  
Beijing, China  
jiajinrang@baidu.com

**Zhenjia Li\***  
Baidu Inc.  
Beijing, China  
lizhenjia@baidu.com

**Yifeng Shi†**  
Baidu Inc.  
Beijing, China  
shiyifeng@baidu.com

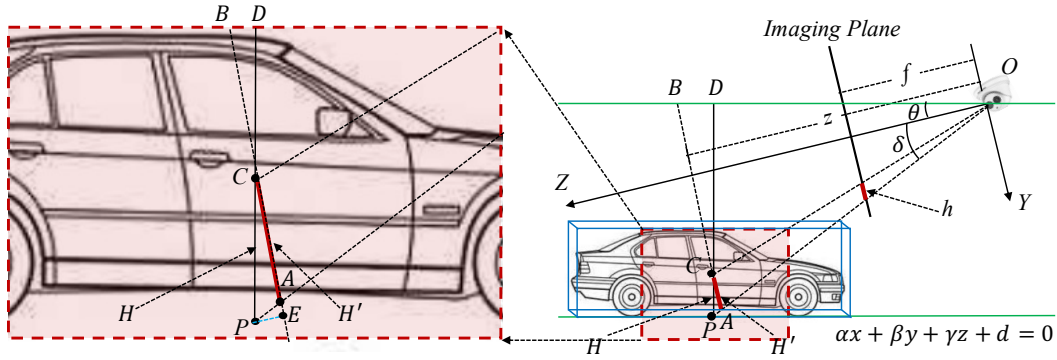

Figure 1: **Infrastructure-side projection model.** The left side is a zoom-in of the right side. As can be seen on the right side,  $O$  in the figure is the optical center of the camera, the ray  $OZ$  denotes the optical axis ( $z$ -axis), point  $C$  represents the center point of the obstacle,  $P$  represents the intersection point between the vertical line from the center point  $C$  to the ground and the ground plane,  $H$  denotes the 3D distance of  $PC$ , and  $h$  is the pixel distance from the center point  $C$  to the ground in the imaging plane,  $\theta$  is the pitch angle of the camera,  $z$  denotes the depth of center point  $C$ ,  $f$  represents the focal length and  $\delta$  is the included angle between the line connecting the point  $P$  to the optical center  $O$  and  $OZ$ .

## 1 Detailed calculation process of the normalized depth

Our aim is to work out how to express the depth  $z$  and further derive the normalized depth. First, since the image plane is parallel to the  $AB$  ( $AB$  is the virtual auxiliary plane set by us), we can get:

$$\frac{H'}{h} = \frac{z}{f} \quad (1)$$

where  $H' = AC$ . Here,  $f$  is a known quantity and  $h$  is easily obtained from visual features, so we only need to obtain  $H'$ . From point  $P$  to straight line  $AB$  draw an auxiliary vertical line and intersect  $AB$  at point  $E$ , that is,  $PE$  is perpendicular to  $AB$ . We can get:

$$H' = AC = CE - AE \quad (2)$$

Since:

$$CE = PC * \cos \angle ACP \quad (3)$$

\*Equal contribution.

†Corresponding author.

$$AE = PE * \tan \angle APE = PC * \sin \angle ACP * \tan \angle APE \quad (4)$$

$$H = PC \quad (5)$$

We have:

$$H' = H \cos \angle ACP - H \sin \angle ACP * \tan \angle APE \quad (6)$$

According to the parallel relationship, we can get:  $\angle ACP = \theta$ ,  $\angle APE = \delta$ . Thus:

$$H' = H \cos \theta - H \sin \theta * \tan \delta = H * (\cos \theta - \sin \theta * \tan \delta) \quad (7)$$

Substitute it into equation (1) and we get:

$$z = \frac{H}{h} * (\cos \theta - \sin \theta * \tan \delta) * f \quad (8)$$

## 2 More detailed results on three benchmarks

### 2.1 Detailed results on KITTI

| Method               | Reference    | Extra Data | $AP_{3D}(IOU = 0.7 R_{40})$ |              |              | $AP_{BEV}(IOU = 0.7 R_{40})$ |              |              |
|----------------------|--------------|------------|-----------------------------|--------------|--------------|------------------------------|--------------|--------------|
|                      |              |            | Easy                        | Mod.         | Hard         | Easy                         | Mod.         | Hard         |
| MonoPSR [7]          | CVPR 2019    | LIDAR      | 10.76                       | 7.25         | 5.85         | 18.33                        | 12.58        | 9.91         |
| PatchNet [14]        | ECCV 2020    | Depth      | 15.68                       | 11.12        | 10.17        | 22.97                        | 16.86        | 14.97        |
| D4LCN[5]             | CVPR 2020    | Depth      | 16.65                       | 11.72        | 9.51         | 22.51                        | 16.02        | 12.55        |
| MonoRUn [3]          | CVPR 2021    | LIDAR      | 19.65                       | 12.30        | 10.58        | 27.94                        | 17.34        | 15.24        |
| CaDDN [18]           | CVPR 2021    | LIDAR      | 19.17                       | 13.41        | 11.46        | 27.94                        | 18.91        | 17.19        |
| DFR-Net [29]         | ICCV 2021    | Depth      | 19.40                       | 13.63        | 10.35        | 28.17                        | 19.17        | 14.84        |
| AutoShape [12]       | ICCV 2021    | CAD        | 22.47                       | 14.17        | 11.36        | 30.66                        | 20.08        | 15.59        |
| DID-M3D [17]         | ECCV 2022    | Depth      | 24.40                       | 16.29        | 13.75        | 32.95                        | 22.76        | 19.83        |
| DD3D [16]            | ICCV 2021    | Depth      | 23.22                       | 16.34        | 14.20        | 30.98                        | 22.56        | 20.03        |
| MoGDE [27]           | NeurIPS 2022 | Odometry   | 27.07                       | 17.88        | 15.66        | 38.38                        | 25.60        | 22.91        |
| M3D-RPN [1]          | ICCV 2019    | None       | 14.76                       | 9.71         | 7.42         | 21.02                        | 13.67        | 10.23        |
| SMOKE [11]           | CVPR 2020    | None       | 14.03                       | 9.76         | 7.84         | 20.83                        | 14.49        | 12.75        |
| MonoPair [4]         | CVPR2020     | None       | 13.04                       | 9.99         | 8.65         | 19.28                        | 14.83        | 12.89        |
| MonoDLE [15]         | CVPR2021     | None       | 17.23                       | 12.26        | 10.29        | 24.79                        | 18.89        | 16.00        |
| PCT [21]             | NeurIPS 2021 | None       | 21.00                       | 13.37        | 11.31        | 29.65                        | 19.03        | 15.92        |
| MonoFlex [26]        | CVPR 2021    | None       | 19.94                       | 13.89        | 12.07        | 28.23                        | 19.75        | 16.89        |
| MonoEdge [28]        | WACV 2023    | None       | 21.08                       | 14.47        | 12.73        | 28.80                        | 20.35        | 17.57        |
| GUPNet [13]          | ICCV 2021    | None       | 22.26                       | 15.02        | 13.12        | 30.29                        | 21.19        | 18.20        |
| MonoDTR [6]          | CVPR 2022    | None       | 21.99                       | 15.39        | 12.73        | 28.59                        | 20.38        | 17.14        |
| MonoCon [22]         | AAAI 2022    | None       | 22.50                       | 16.46        | 13.95        | 31.12                        | 22.10        | 19.00        |
| <b>MonoUNI(Ours)</b> | -            | None       | <b>24.75</b>                | <b>16.73</b> | <b>13.49</b> | <b>33.28</b>                 | <b>23.05</b> | <b>19.39</b> |

Table 1: **Monocular 3D detection performance of Car category on KITTI test set.** All results are evaluated on KITTI testing server. Same as KITTI leaderboard, methods are ranked under the moderate difficulty level. For the extra data: 1) **LIDAR** denotes methods use extra LIDAR cloud points in training process. 2) **Depth** means utilizing depth maps or models pre-trained under another depth estimation dataset. 3) **CAD** denotes using dense shape annotations provided by CAD models. 4) **Odometry** means utilizing extra odometry poses, images, or a well-trained network. 5) **None** means no extra data is used.

Table 1 lists the results of the vehicle-side 3D detection methods on the KITTI dataset in recent years. Our method ranks first among methods that do not use any additional data, which is improved (2.25%/0.27%/ - 0.46%) in  $AP_{3D}$  and (2.16%/0.95%/0.39%) in  $AP_{BEV}$  compared to MonoCon [22].

## 2.2 Detailed results on Rope3D

Table 2 shows the comparison of the results of methods on the Rope3D dataset in recent years. Compared with other methods, our method has greatly improved  $AP$  and  $Rope_{score}$  which ranks first.

| Method               | Extra Data | $IOU = 0.5$ |        |             |        | $IOU = 0.7$ |        |             |        |
|----------------------|------------|-------------|--------|-------------|--------|-------------|--------|-------------|--------|
|                      |            | Car         |        | Big Vehicle |        | Car         |        | Big Vehicle |        |
|                      |            | $AP$        | $Rope$ | $AP$        | $Rope$ | $AP$        | $Rope$ | $AP$        | $Rope$ |
| M3D-RPN [1]          | Ground     | 54.19       | 62.65  | 33.05       | 44.94  | 16.75       | 32.90  | 6.86        | 24.19  |
| M3D-RPN [1]          | Depth      | 67.17       | 73.14  | 39.06       | 49.95  | 33.94       | 46.45  | 11.28       | 28.12  |
| Kinematic3D [2]      | Ground     | 50.57       | 58.86  | 37.60       | 48.08  | 17.74       | 32.99  | 6.10        | 22.88  |
| MonoDLE [15]         | Ground     | 51.70       | 60.36  | 40.34       | 50.07  | 13.58       | 29.46  | 9.63        | 25.80  |
| MonoDLE [15]         | Depth      | 77.50       | 80.84  | 49.07       | 57.22  | 54.53       | 62.48  | 17.25       | 32.00  |
| MonoFlex [26]        | Ground     | 60.33       | 66.86  | 37.33       | 47.96  | 33.78       | 46.12  | 10.08       | 26.16  |
| MonoFlex [26]        | Depth      | 59.78       | 66.66  | 59.81       | 66.07  | 35.64       | 47.43  | 24.61       | 38.01  |
| BEVFormer [10]       | None       | 50.62       | 58.78  | 34.58       | 45.16  | 24.64       | 38.71  | 10.05       | 25.56  |
| BEVDepth [9]         | None       | 69.63       | 74.70  | 45.02       | 54.64  | 42.56       | 53.05  | 21.47       | 35.82  |
| BEVHeight [24]       | None       | 74.60       | 78.72  | 48.93       | 57.70  | 45.73       | 55.62  | 23.07       | 37.04  |
| <b>MonoUNI(Ours)</b> | None       | 92.45       | 92.63  | 76.30       | 79.20  | 74.50       | 78.26  | 43.04       | 52.63  |

$AP$  and  $Rope$  denote  $AP_{3D|R40}$  and  $Rope_{score}$  respectively.

Table 2: **Monocular 3D detection performance of Car and Big Vehicle categories on Rope3D val set.**

## 2.3 Detailed results on DAIR-V2X-I

| Method               | M  | $Veh. (IOU=0.5)$ |       |       | $Ped. (IOU=0.25)$ |       |       | $Cyc. (IOU=0.25)$ |       |       |
|----------------------|----|------------------|-------|-------|-------------------|-------|-------|-------------------|-------|-------|
|                      |    | Easy             | Mod.  | Hard  | Easy              | Mod.  | Hard  | Easy              | Mod.  | Hard  |
| PointPillars [8]     | L  | 63.07            | 54.00 | 54.01 | 38.53             | 37.20 | 37.28 | 38.46             | 22.60 | 22.49 |
| SECOND [23]          | L  | 71.47            | 53.99 | 54.00 | 55.16             | 52.49 | 52.52 | 54.68             | 31.05 | 31.19 |
| MVXNet [20]          | LC | 71.04            | 53.71 | 53.76 | 55.83             | 54.45 | 54.40 | 54.05             | 30.79 | 31.06 |
| ImvoxelNet [19]      | C  | 44.78            | 37.58 | 37.55 | 6.81              | 6.746 | 6.73  | 21.06             | 13.57 | 13.17 |
| BEVFormer [10]       | C  | 61.37            | 50.73 | 50.73 | 16.89             | 15.82 | 15.95 | 22.16             | 22.13 | 22.06 |
| BEVDepth [9]         | C  | 75.50            | 63.58 | 63.67 | 34.95             | 33.42 | 33.27 | 55.67             | 55.47 | 55.34 |
| BEVHeight [24]       | C  | 77.78            | 65.77 | 65.85 | 41.22             | 39.29 | 39.46 | 60.23             | 60.08 | 60.54 |
| <b>MonoUNI(Ours)</b> | C  | 90.92            | 87.24 | 87.20 | 51.78             | 49.10 | 48.02 | 69.05             | 69.80 | 69.64 |

M, L, C denotes modality, LiDAR, camera respectively.

Table 3: **Monocular 3D detection performance of Car category on DAIR-V2X-I val set.**

## 3 Repartitioning of the Rope3D dataset

To investigate the influence of focal length diversity on model performance, we partitioned the Rope3D [25] dataset according to the focal length of each image. We observed that the focal lengths of the Rope3D dataset predominantly fell within two focal length ranges: 2150-2200 and 2749-2780. Based on the provided training-test distribution from the official website and taking into account the focal length of each image, we reorganized the Rope3D dataset as follows:

Table 4: **The number of images in each subset of the Rope3D dataset.**

| numbers | 2100  | 2700  | all   |
|---------|-------|-------|-------|
| Train   | 20247 | 20086 | 40333 |
| Val     | 3149  | 1527  | 4676  |

We conducted training and evaluation on three distinct sets using the widely adopted two-stage approach GUPNet [13], the single-stage approach SMOKE [11], and our proposed method MonoUNI, respectively.

Table 5: Analysis for different focal lengths on Rope3D dataset with new train/val division.

| Method      | Train_set  | $AP_{3D}(IOU = 0.5 R_{40})$ |          |         |
|-------------|------------|-----------------------------|----------|---------|
|             |            | val_2100                    | val_2700 | val_all |
| GUPNet [13] | train_2100 | 13.20                       | 0.03     | 7.42    |
| GUPNet [13] | train_2700 | 0.17                        | 21.65    | 3.07    |
| GUPNet [13] | train_all  | 10.82                       | 5.85     | 9.38    |
| SMOKE [11]  | train_2100 | 9.77                        | 0.13     | 6.19    |
| SMOKE [11]  | train_2700 | 0.04                        | 23.20    | 3.64    |
| SMOKE [11]  | train_all  | 6.04                        | 18.01    | 8.48    |
| MonoUNI     | train_2100 | 25.78                       | 21.30    | 24.47   |
| MonoUNI     | train_2700 | 5.77                        | 23.42    | 9.25    |
| MonoUNI     | train_all  | 26.63                       | 38.10    | 28.91   |

As shown in Table 5, due to the presence of ambiguity issues arising from focal length and mounting angles, the ordinary vehicle-side 3D detection methods exhibited lower AP on individual focal length testing subsets when trained on the entire dataset, compared to training them separately on the corresponding focal length training subsets. MonoUNI introduces the concept of normalized depth to address the ambiguity issue, effectively mitigating the mutual interference problem between two different focal length training subsets. By employing this approach, MonoUNI achieves state-of-the-art average precision (AP) performance across all testing subsets. Interestingly, when training solely on the *train\_2100* subset, the model achieved a level of accuracy on the *val\_2700* subset that was comparable to models trained exclusively on the *train\_2700* subset. This further highlights the effectiveness of our method.

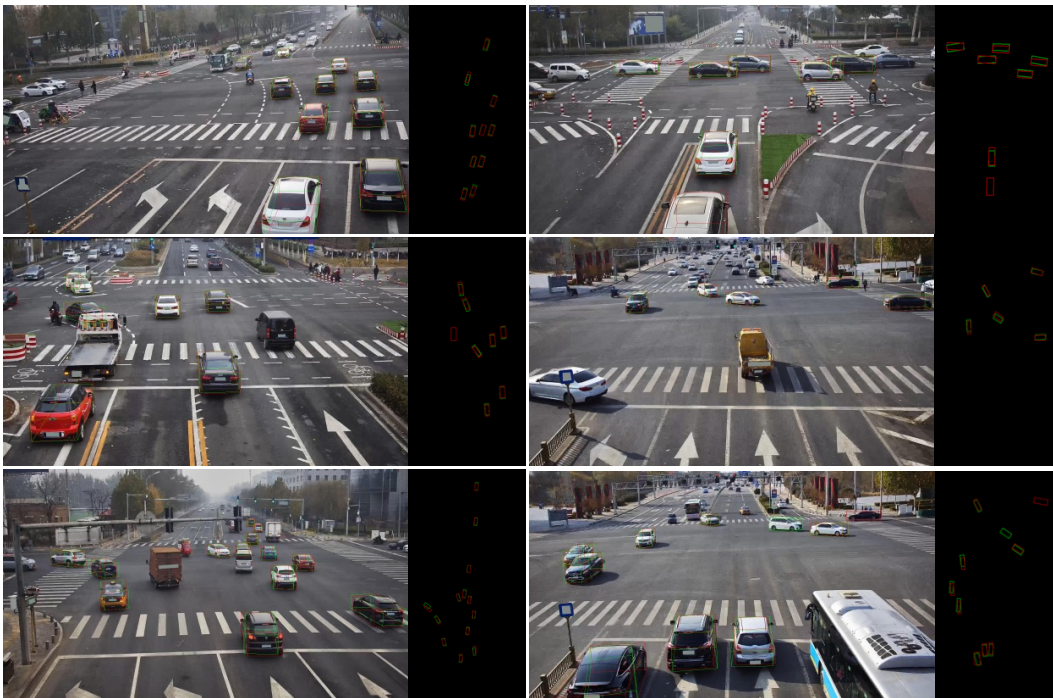

Figure 2: **Qualitative Results on Rope3D.** The 3D **green boxes** are produced by MonoUNI and the **red boxes** are the ground truths.



## 4 More Qualitative Results

We provide more qualitative results in Figure 2 and Figure 3.

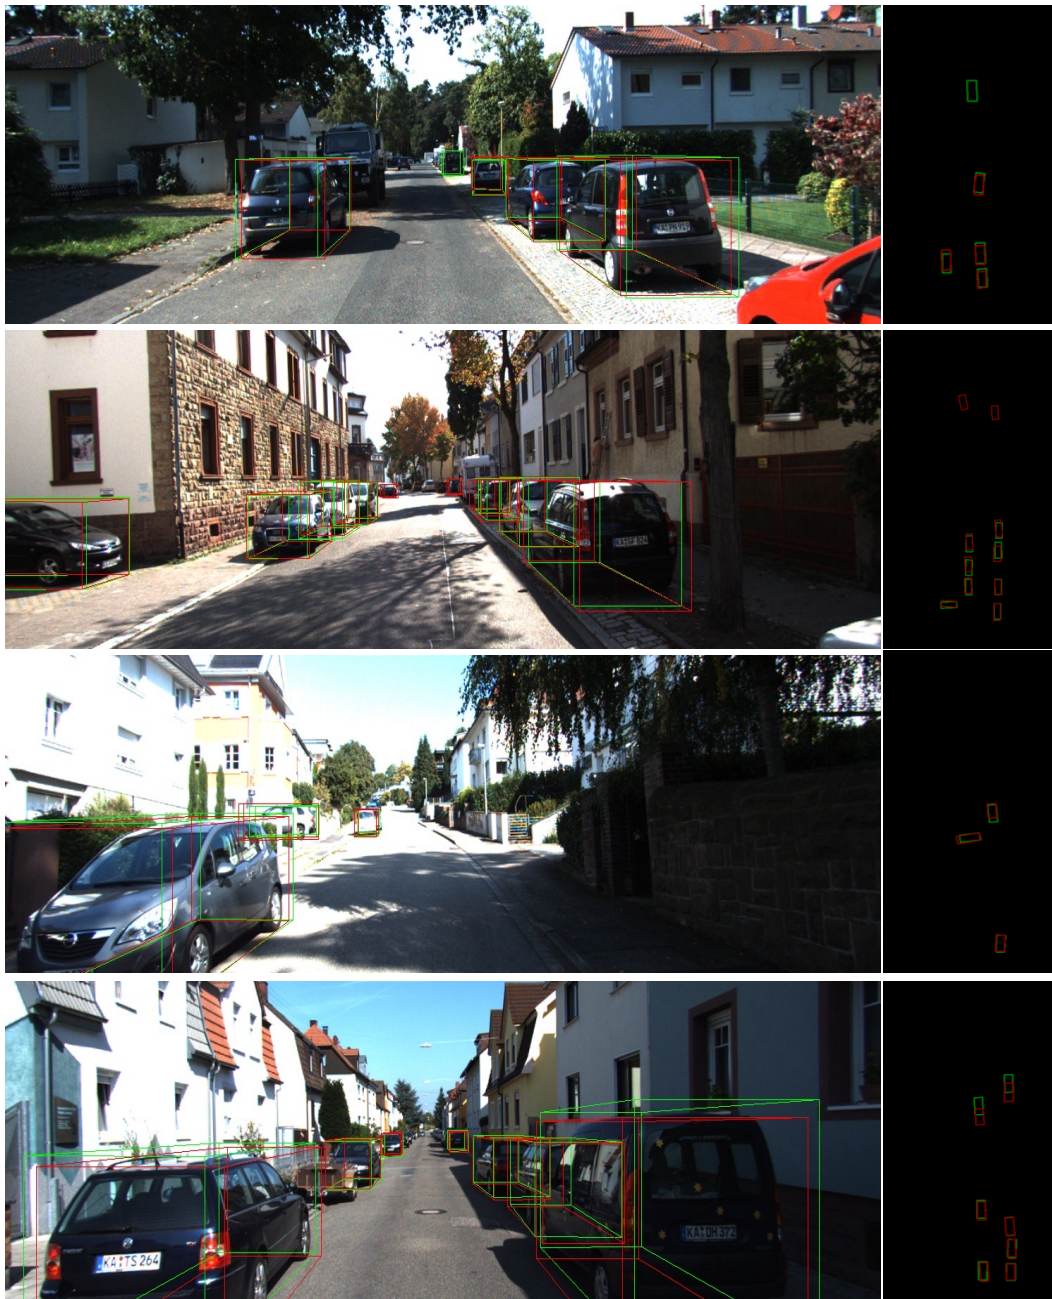

Figure 3: **Qualitative Results on KITTI.** The 3D **green boxes** are produced by MonoUNI and the **red boxes** are the ground truths.

## References

- [1] Garrick Brazil and Xiaoming Liu. M3d-rpn: Monocular 3d region proposal network for object detection. In *Proceedings of the IEEE/CVF International Conference on Computer Vision (ICCV)*, October 2019.
- [2] Garrick Brazil, Gerard Pons-Moll, Xiaoming Liu, and Bernt Schiele. Kinematic 3d object detection in monocular video. In *Computer Vision—ECCV 2020: 16th European Conference, Glasgow, UK, August 23–28, 2020, Proceedings, Part XXIII 16*, pages 135–152, 2020.

- [3] Hansheng Chen, Yuyao Huang, Wei Tian, Zhong Gao, and Lu Xiong. Monorun: Monocular 3d object detection by reconstruction and uncertainty propagation. In *Proceedings of the IEEE/CVF Conference on Computer Vision and Pattern Recognition (CVPR)*, pages 10379–10388, June 2021.
- [4] Yongjian Chen, Lei Tai, Kai Sun, and Mingyang Li. Monopair: Monocular 3d object detection using pairwise spatial relationships. In *IEEE/CVF Conference on Computer Vision and Pattern Recognition (CVPR)*, June 2020.
- [5] Mingyu Ding, Yuqi Huo, Hongwei Yi, Zhe Wang, Jianping Shi, Zhiwu Lu, and Ping Luo. Learning depth-guided convolutions for monocular 3d object detection. In *IEEE/CVF Conference on Computer Vision and Pattern Recognition (CVPR)*, June 2020.
- [6] Kuan-Chih Huang, Tsung-Han Wu, Hung-Ting Su, and Winston H. Hsu. Monodr: Monocular 3d object detection with depth-aware transformer. In *Proceedings of the IEEE/CVF Conference on Computer Vision and Pattern Recognition (CVPR)*, pages 4012–4021, June 2022.
- [7] Jason Ku, Alex D. Pon, and Steven L. Waslander. Monocular 3d object detection leveraging accurate proposals and shape reconstruction. In *Proceedings of the IEEE/CVF Conference on Computer Vision and Pattern Recognition (CVPR)*, June 2019.
- [8] Alex H. Lang, Sourabh Vora, Holger Caesar, Lubing Zhou, Jiong Yang, and Oscar Beijbom. Pointpillars: Fast encoders for object detection from point clouds. In *Proceedings of the IEEE/CVF Conference on Computer Vision and Pattern Recognition (CVPR)*, June 2019.
- [9] Yin hao Li, Zheng Ge, Guanyi Yu, Jinrong Yang, Zengran Wang, Yukang Shi, Jianjian Sun, and Zeming Li. Bevdepth: Acquisition of reliable depth for multi-view 3d object detection. *arXiv preprint arXiv:2206.10092*, 2022.
- [10] Zhiqi Li, Wenhai Wang, Hongyang Li, Enze Xie, Chonghao Sima, Tong Lu, Yu Qiao, and Jifeng Dai. Bevformer: Learning bird’s-eye-view representation from multi-camera images via spatiotemporal transformers. In *Computer Vision–ECCV 2022: 17th European Conference, Tel Aviv, Israel, October 23–27, 2022, Proceedings, Part IX*, pages 1–18, 2022.
- [11] Zechen Liu, Zizhang Wu, and Roland Toth. Smoke: Single-stage monocular 3d object detection via keypoint estimation. In *Proceedings of the IEEE/CVF Conference on Computer Vision and Pattern Recognition (CVPR) Workshops*, June 2020.
- [12] Zongdai Liu, Dingfu Zhou, Feixiang Lu, Jin Fang, and Liangjun Zhang. Autosshape: Real-time shape-aware monocular 3d object detection. In *Proceedings of the IEEE/CVF International Conference on Computer Vision (ICCV)*, pages 15641–15650, October 2021.
- [13] Yan Lu, Xinzhu Ma, Lei Yang, Tianzhu Zhang, Yating Liu, Qi Chu, Junjie Yan, and Wanli Ouyang. Geometry uncertainty projection network for monocular 3d object detection. In *Proceedings of the IEEE/CVF International Conference on Computer Vision (ICCV)*, pages 3111–3121, October 2021.
- [14] Xinzhu Ma, Shinan Liu, Zhiyi Xia, Hongwen Zhang, Xingyu Zeng, and Wanli Ouyang. Rethinking pseudo-lidar representation. In *Proceedings of the European Conference on Computer Vision (ECCV)*, 2020.
- [15] Xinzhu Ma, Yinmin Zhang, Dan Xu, Dongzhan Zhou, Shuai Yi, Haojie Li, and Wanli Ouyang. Delving into localization errors for monocular 3d object detection. In *Proceedings of the IEEE/CVF Conference on Computer Vision and Pattern Recognition (CVPR)*, pages 4721–4730, June 2021.
- [16] Dennis Park, Rares Ambrus, Vitor Guizilini, Jie Li, and Adrien Gaidon. Is pseudo-lidar needed for monocular 3d object detection? In *Proceedings of the IEEE/CVF International Conference on Computer Vision (ICCV)*, pages 3142–3152, October 2021.
- [17] Liang Peng, Xiaopei Wu, Zheng Yang, Haifeng Liu, and Deng Cai. Did-m3d: Decoupling instance depth for monocular 3d object detection. In *European Conference on Computer Vision*, 2022.
- [18] Cody Reading, Ali Harakeh, Julia Chae, and Steven L. Waslander. Categorical depth distribution network for monocular 3d object detection. In *Proceedings of the IEEE/CVF Conference on Computer Vision and Pattern Recognition (CVPR)*, pages 8555–8564, June 2021.
- [19] Danila Rukhovich, Anna Vorontsova, and Anton Konushin. Imvoxelnet: Image to voxels projection for monocular and multi-view general-purpose 3d object detection. In *Proceedings of the IEEE/CVF Winter Conference on Applications of Computer Vision (WACV)*, pages 2397–2406, January 2022.
- [20] Vishwanath A Sindagi, Yin Zhou, and Oncel Tuzel. Mvx-net: Multimodal voxelnet for 3d object detection. In *2019 International Conference on Robotics and Automation (ICRA)*, pages 7276–7282. IEEE, 2019.
- [21] Li Wang, Li Zhang, Yi Zhu, Zhi Zhang, Tong He, Mu Li, and Xiangyang Xue. Progressive coordinate transforms for monocular 3d object detection. In M. Ranzato, A. Beygelzimer, Y. Dauphin, P.S. Liang, and J. Wortman Vaughan, editors, *Advances in Neural Information Processing Systems*, volume 34, pages 13364–13377. Curran Associates, Inc., 2021.
- [22] Tianfu Wu Xianpeng Liu, Nan Xue. Learning auxiliary monocular contexts helps monocular 3d object detection. In *36th AAAI Conference on Artificial Intelligence (AAAI)*, February 2022.
- [23] Yan Yan, Yuxing Mao, and Bo Li. Second: Sparsely embedded convolutional detection. *Sensors*, 18(10):3337, 2018.
- [24] Lei Yang, Kaicheng Yu, Tao Tang, Jun Li, Kun Yuan, Li Wang, Xinyu Zhang, and Peng Chen. Bevheight: A robust framework for vision-based roadside 3d object detection. In *IEEE/CVF Conf. on Computer Vision and Pattern Recognition (CVPR)*, Mar. 2023.
- [25] Xiaoqing Ye, Mao Shu, Hanyu Li, Yifeng Shi, Yingying Li, Guangjie Wang, Xiao Tan, and Errui Ding. Rope3d: The roadside perception dataset for autonomous driving and monocular 3d object detection task. In *Proceedings of the IEEE/CVF Conference on Computer Vision and Pattern Recognition (CVPR)*, pages

- 21341–21350, June 2022.
- [26] Yunpeng Zhang, Jiwen Lu, and Jie Zhou. Objects are different: Flexible monocular 3d object detection. In *Proceedings of the IEEE/CVF Conference on Computer Vision and Pattern Recognition (CVPR)*, pages 3289–3298, June 2021.
  - [27] Yunsong Zhou, Quan Liu, Hongzi Zhu, Yunzhe Li, Shan Chang, and Minyi Guo. Mogde: Boosting mobile monocular 3d object detection with ground depth estimation. In S. Koyejo, S. Mohamed, A. Agarwal, D. Belgrave, K. Cho, and A. Oh, editors, *Advances in Neural Information Processing Systems*, volume 35, pages 2033–2045. Curran Associates, Inc., 2022.
  - [28] Minghan Zhu, Lingting Ge, Panqu Wang, and Huei Peng. Monoedge: Monocular 3d object detection using local perspectives. In *Proceedings of the IEEE/CVF Winter Conference on Applications of Computer Vision (WACV)*, pages 643–652, January 2023.
  - [29] Zhikang Zou, Xiaoqing Ye, Liang Du, Xianhui Cheng, Xiao Tan, Li Zhang, Jianfeng Feng, Xiangyang Xue, and Errui Ding. The devil is in the task: Exploiting reciprocal appearance-localization features for monocular 3d object detection. In *Proceedings of the IEEE/CVF International Conference on Computer Vision (ICCV)*, pages 2713–2722, October 2021.
